# Supplementary material for: Evaluation of Soybean Wildfire Prediction via Hyperspectral Imaging
Source: MDPI journal article supplement (doi:10.3390/plants12040901), 2023-02-16
Supplement: s1 [file s1]

**Table S1.** Formula table for classification equation accuracy verification

| Cheongja 3-ho     |              | Daechan           |              |
|-------------------|--------------|-------------------|--------------|
| Selected Function | Accuracy (%) | Selected Function | Accuracy (%) |
| 1                 | 81.90        | 1                 | 65.87        |
| 2                 | 61.21        | 2                 | 68.75        |
| <b>3</b>          | <b>95.69</b> | <b>3</b>          | <b>100</b>   |
| 4                 | 81.90        | 4                 | 65.87        |
| 5                 | 80.17        | 5                 | 70.19        |
| 6                 | 81.90        | 6                 | 75.00        |
| 7                 | 80.17        | 7                 | 70.19        |
| 8                 | 79.31        | 8                 | 67.79        |
| 9                 | 80.17        | 9                 | 72.60        |

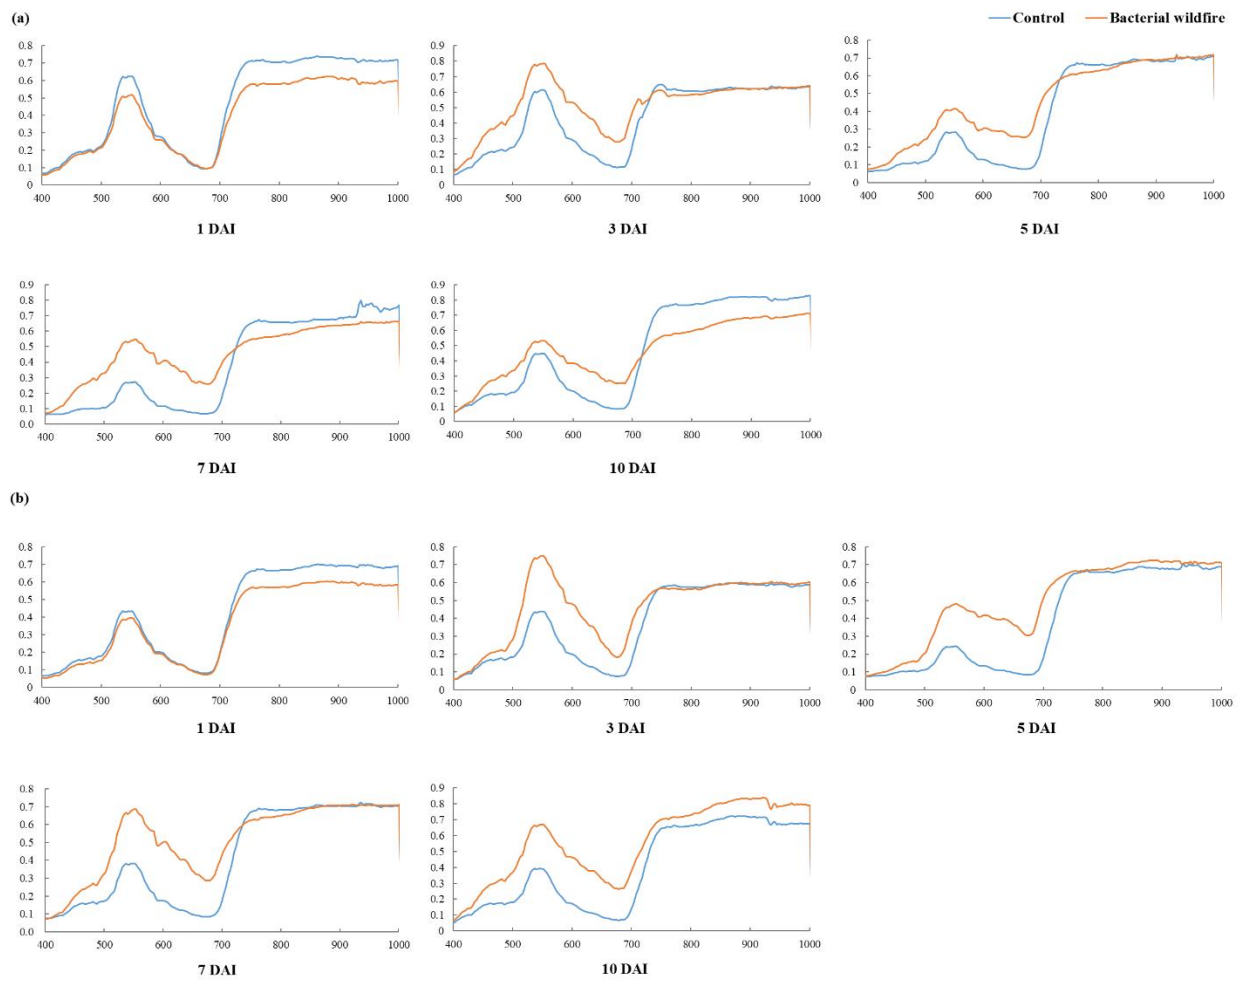

Figure S1. Spectral reflectance of healthy and diseased soybean leaves of the (a) Cheongja 3-ho and (b) Daechan varieties.
